# Supplementary material for: A highly porous and conductive composite gate electrode for OTFT sensors
Source: Royal Society of Chemistry journal article supplement (doi:10.1039/c9ra00148d), 2019-01-01
Supplement: c9ra00148d1.pdf [file c9ra00148d1.pdf]

## Supplementary information

### **A highly porous and conductive composite gate electrode for OTFT sensors**

*Soniya D. Yambem,<sup>\*ab</sup> Samantha Burns,<sup>a</sup> Joshua N. Arthur,<sup>ab</sup> Jana Timm,<sup>c</sup> Maria A. Woodruff,<sup>ab</sup> Ajay K. Pandey<sup>bd</sup> and Roland Marschall<sup>c</sup>*

<sup>a</sup>School of Chemistry Physics and Mechanical Engineering, Science and Engineering Faculty, Queensland University of Technology (QUT), Brisbane QLD 4000, Australia

<sup>b</sup>Institute of Health and Biomedical Innovation, Queensland University of Technology (QUT), Kelvin Grove, Queensland 4059, Australia

<sup>c</sup>Department of Chemistry, University of Bayreuth, Bayreuth 95447, Germany

<sup>d</sup>School of Electrical Engineering and Computer Science, Science and Engineering Faculty, Queensland University of Technology (QUT), Brisbane QLD 4000, Australia

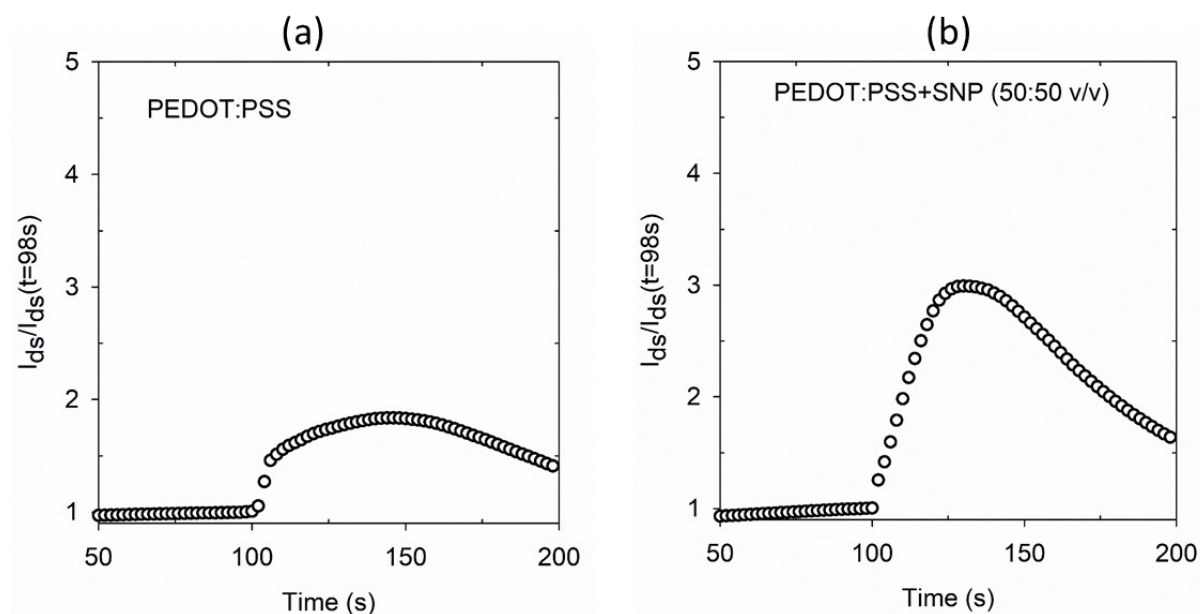

**Figure S1.** Normalised modulation in  $I_{ds}$  upon sensing of protons for (a) OTFT with PEDOT:PSS gate and (b) PEDOT:PSS:SNP (50:50, v/v) gate.

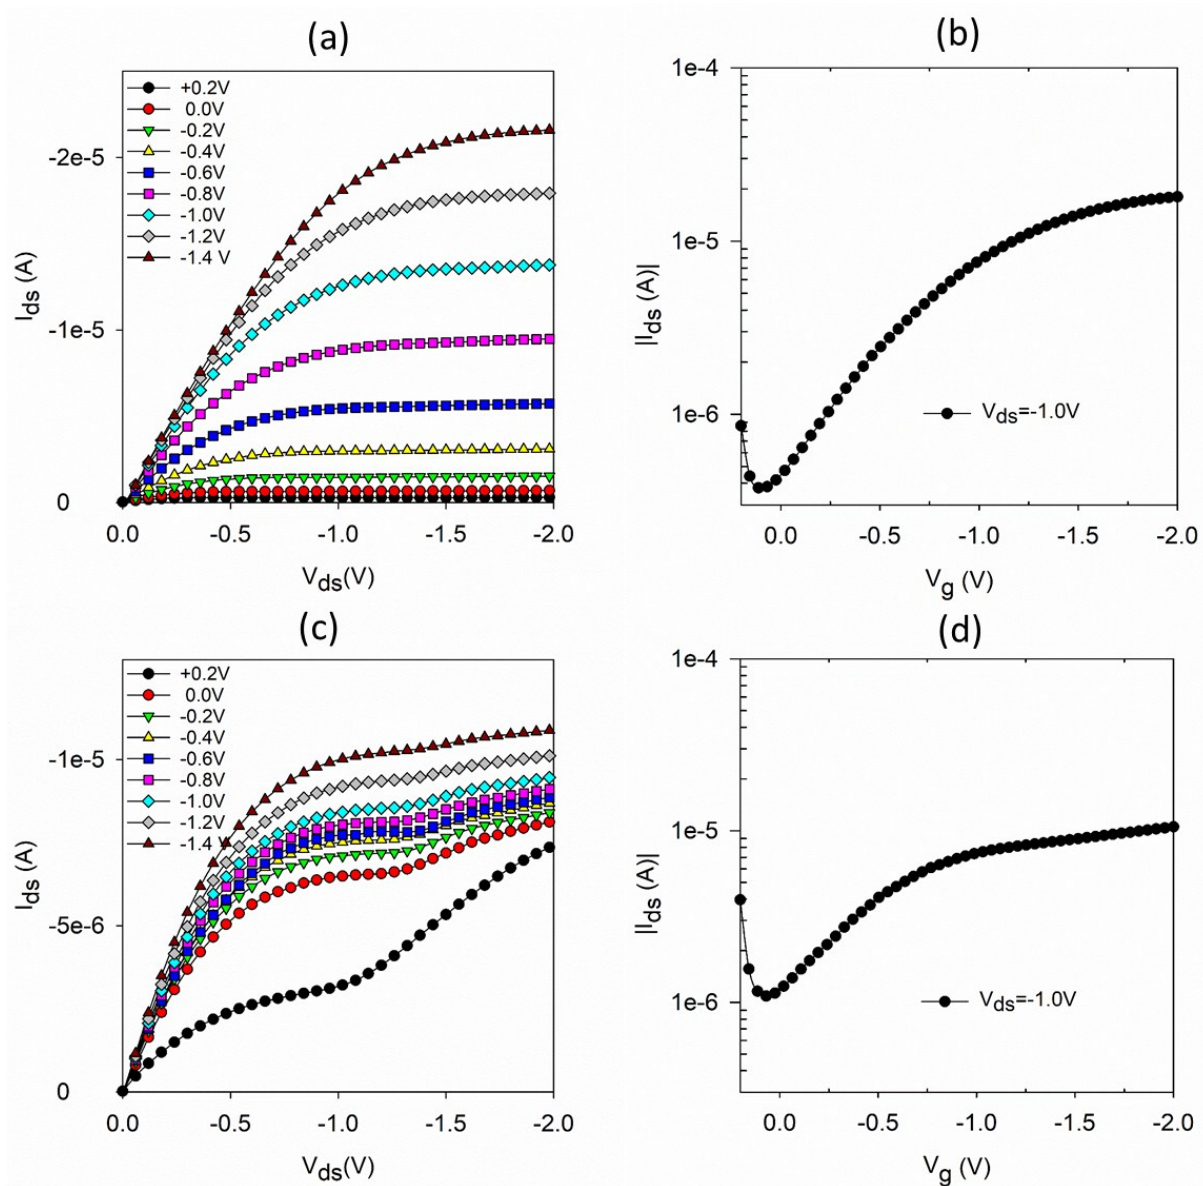

**Figure S2.** (a) Output and (b) transfer characteristics of OTFT with PEDOT:PSS gate (0% SNP). (c) Output and (d) transfer characteristics of OTFT with SNP gate (100% SNP).

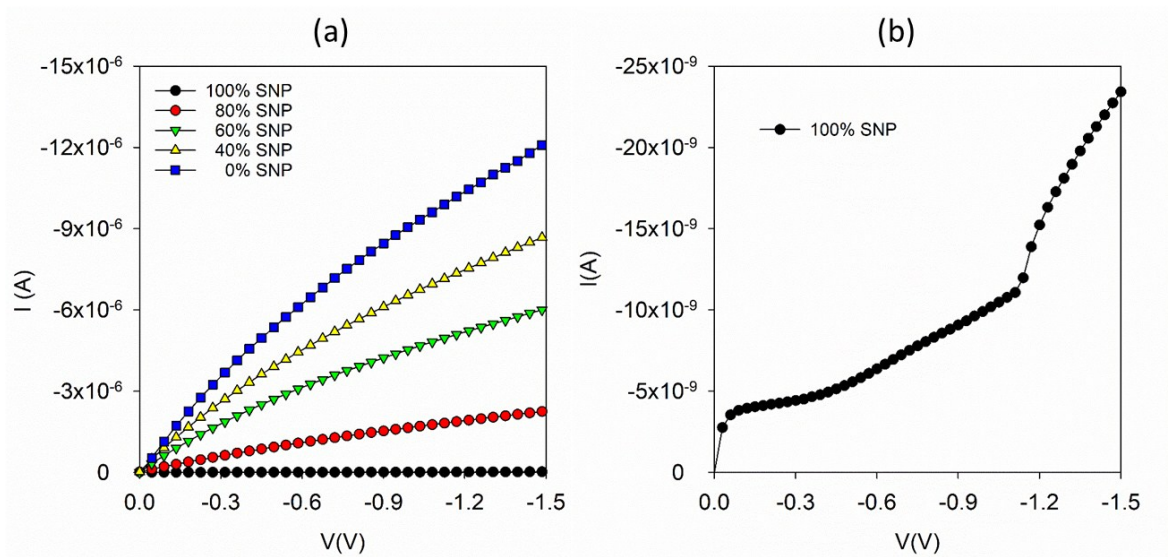

**Figure S3.** Current-voltage sweeps of gates electrode materials. The films had the same dimensions. They were deposited on ITO contact pads.
